# Supplementary material for: Psychometric Properties of Interpersonal Regulation Questionnaire for Chinese College Students: Gender Differences and Implications for Well-Being
Source: MDPI journal article supplement (doi:10.3390/bs13060507), 2023-06-16
Supplement: s1 [file s1]

**Table S1.** Estimation of latent gender differences across four IRQ factors.

|                   | Male<br>(n=209) | Female<br>(n=346) | SE   | <i>p</i> | <i>Cohen's d</i> |
|-------------------|-----------------|-------------------|------|----------|------------------|
| Negative Tendency | 0               | .364              | .100 | 0.000    | .304             |
| Negative Efficacy | 0               | .474              | .091 | 0.000    | .376             |
| Positive Tendency | 0               | .032              | .100 | 0.748    | .031             |
| Positive Efficacy | 0               | .002              | .097 | 0.987    | .002             |

**Table S2.** Standardized factor loadings for the confirmatory factor analysis models.

| Model                              | $\chi^2$ | <i>df</i> | CFI  | RMSEA[90% CI]   | SRMR |
|------------------------------------|----------|-----------|------|-----------------|------|
| Model with four-factor             | 366.77   | 100       | .890 | .070[.063-.078] | .088 |
| Model with one higher-order factor | 432.46   | 100       | .864 | .079[.071-.086] | .075 |

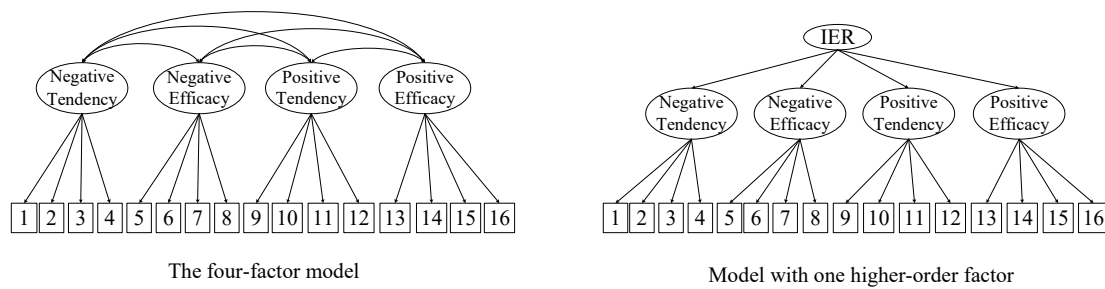

**Figure S1.** Graphical representation of the confirmatory factor models. *Note.* IER = interpersonal emotion regulation.
